# Supplementary material for: Parkinson’s Families Project: a UK-wide study of early onset and familial Parkinson’s disease
Source: bioRxiv or medRxiv preprint supplement (doi:10.1101/2023.12.05.23299397), 2024-09-10
Supplement: Supplementary file [file media-1.pdf]

# Supplementary Materials

## **Parkinson's Families Project: a UK-wide study of early onset and familial Parkinson's disease**

Theresa M. Schmaderer\*, Clodagh Towns\*, Simona Jasaityte, Manuela M. X. Tan, Miriam Pollard, Megan Hodgson, Lesley Wu, Russel Tilney, Robyn Labrum, Jason Hehir, James Polke, Kailash P. Bhatia, Henry Houlden, Nicholas Wood, Paul R. Jarman, Huw R. Morris<sup>^</sup>, Raquel Real<sup>^</sup>, on behalf of the PFP Study Group

\*These authors contributed equally to this work.

<sup>^</sup> Joint senior authors.

## Table of Contents

|                             |    |
|-----------------------------|----|
| PFP Study Group .....       | 3  |
| Supplementary Figure 1..... | 5  |
| Supplementary Figure 2..... | 6  |
| Supplementary Table 1.....  | 7  |
| Supplementary Table 2.....  | 9  |
| Supplementary Table 3.....  | 10 |
| Supplementary Table 4.....  | 11 |
| Supplementary Table 5.....  | 12 |
| Supplementary Table 6.....  | 13 |
| Supplementary Table 7.....  | 14 |

## **PFP Study Group**

**Lead Investigators:** Prof Huw R. Morris (UCL Queen Square Institute of Neurology), Dr Paul Jarman (National Hospital for Neurology and Neurosurgery), Prof Henry Houlden (UCL Queen Square Institute of Neurology), Prof Nicholas W. Wood (UCL Queen Square Institute of Neurology), Dr Raquel Real (UCL Queen Square Institute of Neurology)

**Co-Investigators:** Manuela Tan (UCL Queen Square Institute of Neurology), Russel Tilney (UCL Queen Square Institute of Neurology)

**Principal investigators for sites:** Huw R. Morris (Royal Free London NHS Trust and University College London Hospitals NHS Foundation Trust), Elizabeth Wakeman (Isle of Wight NHS Trust), Tabish Saifee (London North West Healthcare NHS Trust), Sam Arianayagam (Hampshire Hospitals NHS Foundation Trust), Saifuddin Shaik (Lancashire Teaching Hospitals NHS Trust), Sophie Molloy (Imperial College Healthcare NHS Trust and London North West Healthcare NHS Trust), Ralph Gregory (University Hospitals Dorset NHS Foundation Trust), Mirdhu Wickremaratchi (Western Sussex Hospitals NHS Foundation Trust), Rosaria Buccoliero (Harrogate and District NHS Foundation Trust), Oliver Bandmann (Sheffield Teaching Hospital NHS Foundation Trust), Dominic Paviour (St George's University Hospitals NHS Foundation Trust), Diran Padiachy (Salisbury NHS Foundation Trust), Anjum Misbahuddin (Barking, Havering and Redbridge University Hospitals NHS Trust), Jeremy Cosgrove (Leeds Teaching Hospitals NHS Trust), Sunku Guptha (North West Anglia NHS Foundation Trust), Ray Chaudhuri (King's College Hospital NHS Foundation Trust), Yen Tai (The Hillingdon Hospitals NHS Foundation Trust), Sukaina Asad (University Hospitals of Leicester NHS Trust), Ayano Funaki (Central London Community Healthcare NHS Trust), Marek Kunc (Airedale NHS Foundation Trust), Charlotte Brierley (West Suffolk NHS Foundation Trust), Ray Sheridan (Royal Devon & Exeter NHS Foundation Trust), Rena Truscott (Livewell Southwest), Suzanne Dean (Royal Cornwall Hospitals NHS Trust), Carinna Vickers (Somerset NHS Foundation Trust), Rani Sophia (Yeovil District Hospital NHS Foundation Trust), Sion Jones (Betsi Cadwaladr University Health Board), Erica Capps (The Shrewsbury and Telford Hospital NHS Trust), Neil Archibald (South Tees Hospitals NHS Foundation Trust), Louise Wiblin (South Tees Hospitals NHS Foundation Trust), Sean J Slaght (Portsmouth Hospitals NHS Trust), Edward Jones (York Teaching Hospital NHS Foundation Trust), Colin Barnes (Solent NHS Trust), Dominick D'Costa (The Royal Wolverhampton NHS Trust), Carl Mann (Midlands Partnership NHS Foundation Trust), Uma Nath (South Tyneside and Sunderland NHS Foundation Trust), Anette Schrag (Bedfordshire Hospitals NHS Foundation Trust), Dipen Gandecha (St Helens and Knowsley Teaching Hospitals NHS Trust), Gillian Webster (North Cumbria Integrated Care NHS Foundation Trust), Sigurlaug Sveinbjornsdottir (Mid and South Essex NHS Foundation Trust), Lucy Strens (University Hospitals Coventry & Warwickshire), Annette Hand (Northumbria Healthcare NHS Foundation Trust), Richard Walker (Northumbria Healthcare NHS Foundation Trust), Rosemary Crouch (Birmingham Community Healthcare NHS Trust), Jason Raw (Northern Care Alliance NHS Foundation Trust), Stephanie Tuck (Norfolk Community Health & Care NHS Trust), Khaled Amar (University Hospital Dorset NHS Foundation Trust), Emma Wales (Wye Valley NHS Trust), Irene Gentilini (Cambridge University Hospitals NHS

Foundation Trust), Aileen Nacorda (Cambridge University Hospitals NHS Foundation Trust), Louise Hartley (Barts Health NHS Trust)

**Clinical research assistants and support staff for sites:** Simona Jasaityte (Royal Free London NHS Trust and University College London Hospitals NHS Foundation Trust, Research Assistant), Miriam Pollard (Royal Free London NHS Trust and University College London Hospitals NHS Foundation Trust, Research Assistant), Megan Hodgson (University College London Hospitals NHS Foundation Trust, Research Assistant), Clodagh Towns (Royal Free London NHS Trust and University College London Hospitals NHS Foundation Trust, Research Assistant), Sarah Cable (Royal Free London NHS Trust and University College London Hospitals NHS Foundation Trust, Research Assistant), Kaylee Gauntlett (Isle of Wight NHS Trust), Deborah Dellafera (Hampshire Hospitals NHS Foundation Trust, Senior Research Nurse), Vicki Fleming (Lancashire Teaching Hospitals NHS Trust, Research Nurse), Judith Dube (University Hospitals Dorset NHS Foundation Trust, Research Nurse), Sarah House (Western Sussex Hospitals NHS Foundation Trust, Clinical Research Practitioner), Caroline Bennett (Harrogate and District NHS Foundation Trust), Helen Casbolt (Sheffield Teaching Hospital NHS Foundation Trust, Clinical Trials Assistant), James Lee (Salisbury NHS Foundation Trust), Laura Parker-Wall (Barking, Havering and Redbridge University Hospitals NHS Trust, Research Nurse), Prisca Mpofu (Leeds Teaching Hospitals NHS Trust, Research Nurse), Dhaval Trivedi (King's College Hospital NHS Foundation Trust), Sofiya Portukhay (The Hillingdon Hospitals NHS Foundation Trust, Clinical Trials Coordinator), Rehanah Roopun (University Hospitals of Leicester NHS Trust, Research Nurse), Lisa Armstrong (Airedale NHS Foundation Trust, Clinical Trials Coordinator), Clare O'Reilly (Royal Devon & Exeter NHS Foundation Trust, Senior Research Nurse), Jonathan Gilby (Livewell Southwest, Senior Research Practitioner), Nishi Singh (Somerset NHS Foundation Trust, Research Nurse), Alison Lewis (Yeovil District Hospital NHS Foundation Trust, research nurse), Julia Roberts (Betsi Cadwaladr University Health Board), Claire Watkins (Betsi Cadwaladr University Health Board), Hannah Gibson (The Shrewsbury and Telford Hospital NHS Trust, Assistant Research Practitioner), Jo Stickley (The Shrewsbury and Telford Hospital NHS Trust, Research Nurse), Catherine Edwards (Portsmouth Hospitals NHS Trust, PD Nurse Specialist), Kerry Elliott (York Teaching Hospital NHS Foundation Trust, Research Nurse), Emma Searle (Solent NHS Trust, Research Nurse), Blessing Okoko (The Royal Wolverhampton NHS Trust, Research Nurse), Susan Wilson (South Tyneside and Sunderland NHS Foundation Trust, Research Nurse), Yvonne Croucher (Bedfordshire Hospitals NHS Foundation Trust), Sharon Dealing (St Helens and Knowsley Teaching Hospitals NHS Trust, Research Nurse), Hannah Martin (University Hospitals Coventry & Warwickshire, Advanced Nurse Practitioner), Claire Williams (Birmingham Community Healthcare NHS Trust, Research Nurse), Lucy Booth (Birmingham Community Healthcare NHS Trust, Research Nurse), Steph Howard (Norfolk Community Health & Care NHS Trust), Rochelle Hernandez (University Hospital Dorset NHS Foundation Trust, Research Nurse), Sue Anderson (Wye Valley NHS Trust, Clinical Trials Nurse), Nosheen Khalid (Barts Health NHS Trust, Clinical Trial Practitioner)

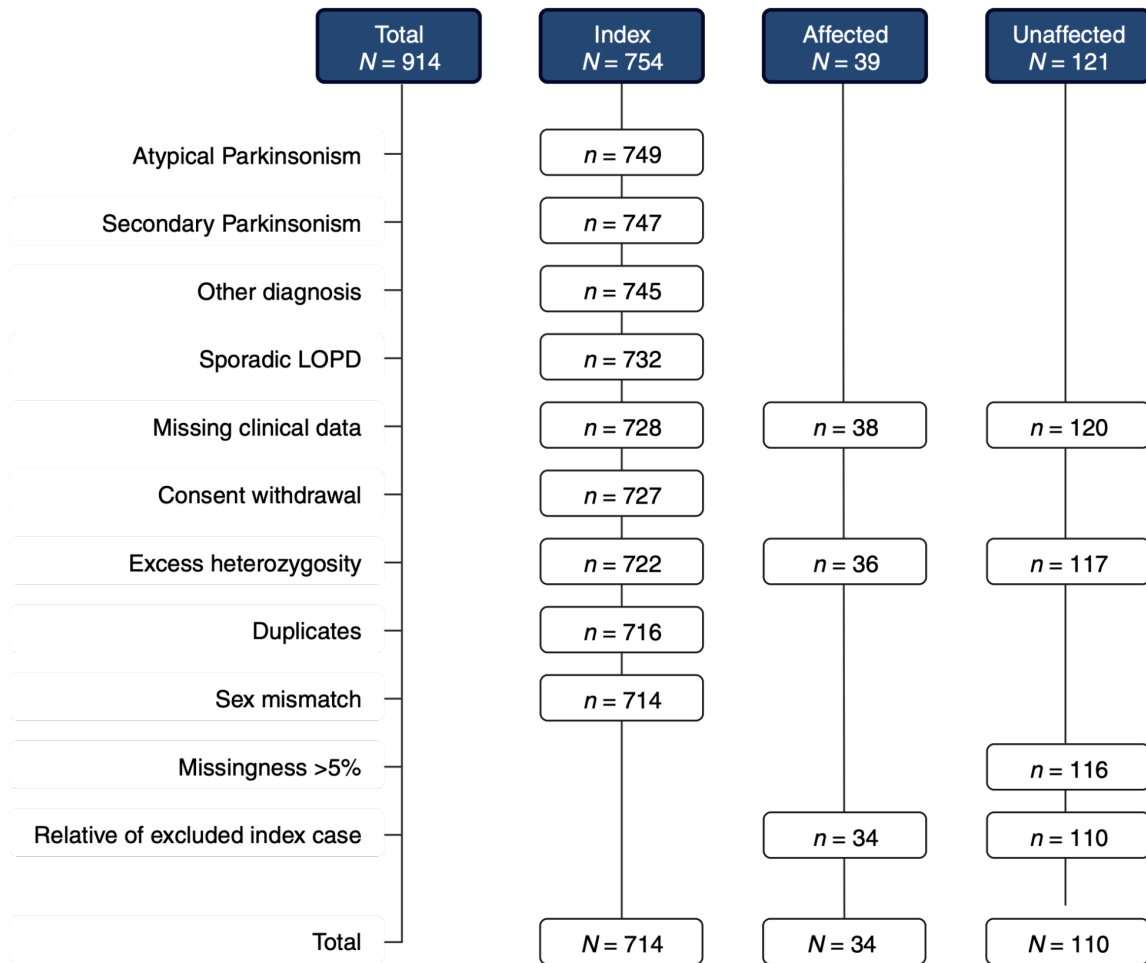

**Supplementary Figure 1.** Flow diagram of participant exclusions.

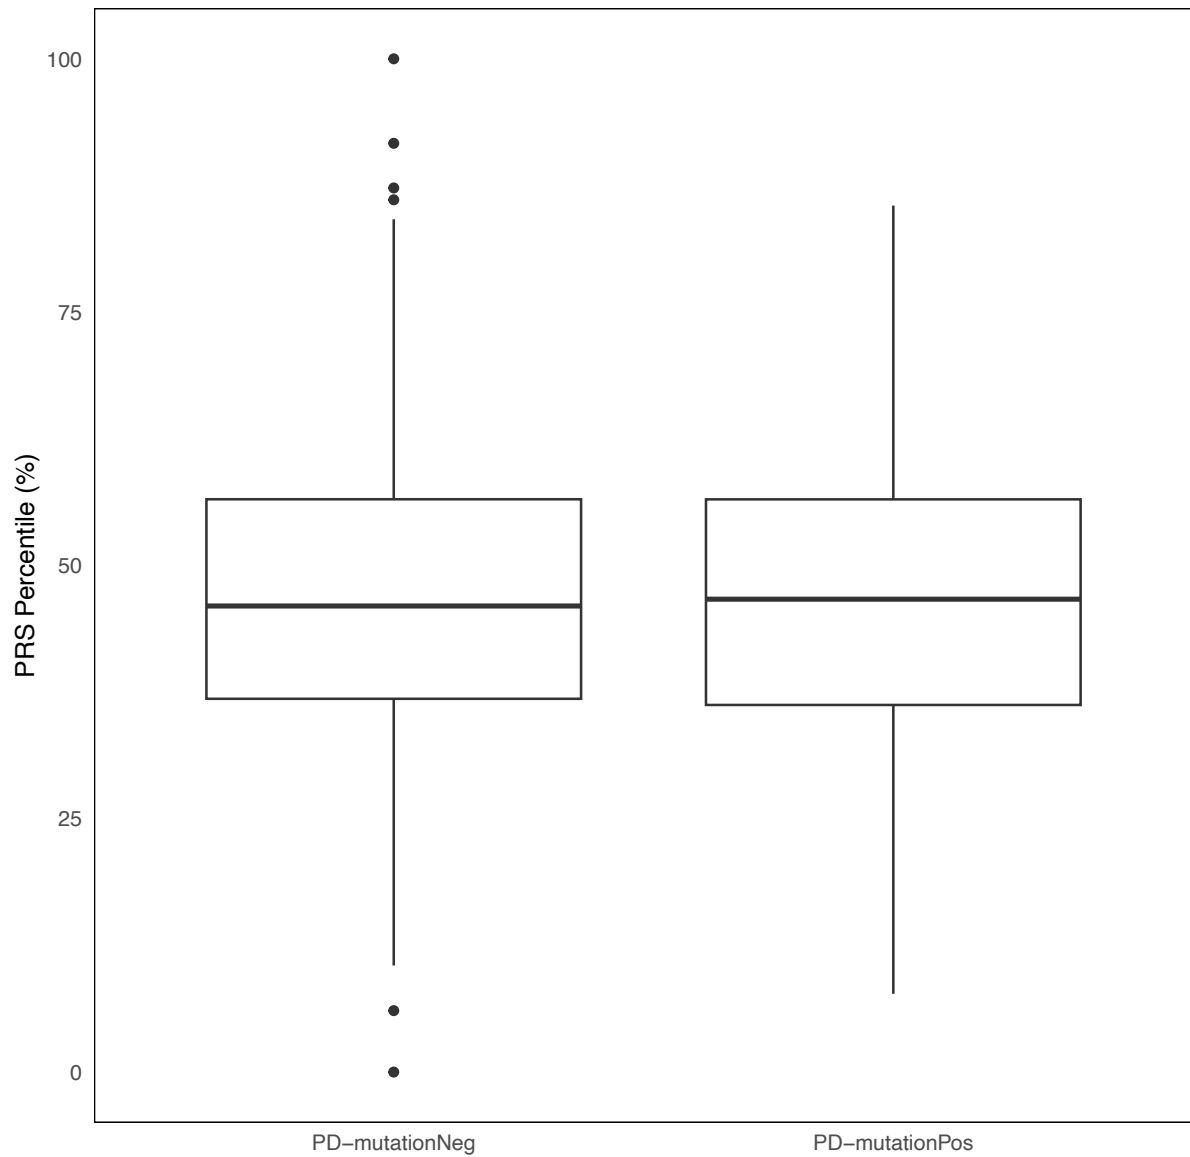

**Supplementary Figure 2.** Percentile of PD polygenic risk scores (PRS) in mutation-negative ( $n = 628$ ) vs mutation-positive PD ( $n = 52$ ). Mutation-negative PD excludes *PINK1* and *PRKN* single heterozygous carriers.

**Supplementary Table 1.** Demographic characteristics and mutation details of families carrying PD-causing pathogenic mutations

| Family ID | Diagnostic category | Sex | Ethnicity        | Zygoty                | Gene          | Variant 1 | Variant 2         | Additional risk variants | Investigations                       |
|-----------|---------------------|-----|------------------|-----------------------|---------------|-----------|-------------------|--------------------------|--------------------------------------|
| 1         | fLOPD               | M   | European         | heterozygous          | <i>LRRK2</i>  | p.G2019S  |                   |                          | NeuroChip                            |
| 2*        | fLOPD               | M   | Ashkenazi Jewish | heterozygous          | <i>LRRK2</i>  | p.G2019S  |                   |                          | NeuroChip, MLPA                      |
| 3         | sEOPD               | M   | European         | heterozygous          | <i>LRRK2</i>  | p.G2019S  |                   |                          | NeuroChip                            |
| 4         | sEOPD               | M   | European         | heterozygous          | <i>LRRK2</i>  | p.G2019S  |                   |                          | NeuroChip                            |
| 5         | fLOPD               | F   | European         | heterozygous          | <i>LRRK2</i>  | p.G2019S  |                   |                          | NeuroChip, MLPA                      |
| 6         | fLOPD               | F   | European         | heterozygous          | <i>LRRK2</i>  | p.G2019S  |                   |                          | NeuroChip                            |
| 7         | sEOPD               | F   | European         | heterozygous          | <i>LRRK2</i>  | p.G2019S  |                   |                          | NeuroChip, MLPA, WGS                 |
| 8^        | fLOPD               | M   | European         | heterozygous          | <i>LRRK2</i>  | p.G2019S  |                   |                          | NeuroChip, MLPA                      |
| 9^        | fLOPD               | F   | European         | heterozygous          | <i>LRRK2</i>  | p.G2019S  |                   |                          | NeuroChip                            |
| 10        | fLOPD               | F   | European         | heterozygous          | <i>LRRK2</i>  | p.G2019S  |                   |                          | NeuroChip                            |
| 11        | fLOPD               | M   | European         | heterozygous          | <i>LRRK2</i>  | p.G2019S  |                   |                          | NeuroChip                            |
| 12        | feOPD               | F   | European         | heterozygous          | <i>LRRK2</i>  | p.G2019S  |                   |                          | NeuroChip                            |
| 13        | sEOPD               | M   | European         | heterozygous          | <i>LRRK2</i>  | p.G2019S  |                   |                          | NeuroChip                            |
| 14        | sEOPD               | M   | European         | heterozygous          | <i>LRRK2</i>  | p.G2019S  |                   |                          | NeuroChip, WGS                       |
| 15        | fLOPD               | F   | Ashkenazi Jewish | heterozygous          | <i>LRRK2</i>  | p.G2019S  |                   | <i>GBA</i> p.L29Afs*18   | NeuroChip, NGS gene panel, WGS       |
| 16        | fLOPD               | F   | European         | heterozygous          | <i>LRRK2</i>  | p.G2019S  |                   |                          | NeuroChip, MLPA                      |
| 17        | feOPD               | F   | European         | heterozygous          | <i>LRRK2</i>  | p.G2019S  |                   |                          | NeuroChip                            |
| 18        | fLOPD               | M   | European         | heterozygous          | <i>LRRK2</i>  | p.G2019S  |                   |                          | NeuroChip, MLPA                      |
| 19        | fLOPD               | M   | European         | heterozygous          | <i>LRRK2</i>  | p.G2019S  |                   |                          | NeuroChip                            |
|           | fLOPD               | M   | European         | heterozygous          | <i>LRRK2</i>  | p.G2019S  |                   |                          | NeuroChip                            |
| 20        | fLOPD               | F   | European         | heterozygous          | <i>LRRK2</i>  | p.G2019S  |                   |                          | NeuroChip, MLPA, WGS                 |
| 21        | fLOPD               | F   | European         | heterozygous          | <i>LRRK2</i>  | p.G2019S  |                   |                          | NeuroChip                            |
| 22        | fLOPD               | F   | European         | heterozygous          | <i>LRRK2</i>  | p.G2019S  |                   |                          | NeuroChip                            |
| 23        | fLOPD               | M   | European         | heterozygous          | <i>LRRK2</i>  | p.G2019S  |                   |                          | NeuroChip                            |
|           | Unaffected          | F   | European         | heterozygous          | <i>LRRK2</i>  | p.G2019S  |                   |                          | NeuroChip                            |
| 23        | Unaffected          | F   | European         | -                     | -             | -         |                   |                          | NeuroChip                            |
|           | Unaffected          | F   | European         | -                     | -             | -         |                   |                          | NeuroChip                            |
| 24        | fLOPD               | M   | European         | heterozygous          | <i>LRRK2</i>  | p.G2019S  |                   |                          | NeuroChip                            |
| 25        | fLOPD               | M   | European         | heterozygous          | <i>LRRK2</i>  | p.G2019S  |                   |                          | NeuroChip                            |
| 26        | fLOPD               | F   | European         | heterozygous          | <i>LRRK2</i>  | p.G2019S  |                   |                          | NeuroChip                            |
| 27        | fLOPD               | F   | Ashkenazi Jewish | heterozygous          | <i>LRRK2</i>  | p.G2019S  |                   |                          | NeuroChip, WGS                       |
| 28        | fLOPD               | M   | NA               | heterozygous          | <i>LRRK2</i>  | p.G2019S  |                   |                          | WGS                                  |
| 29        | fLOPD               | M   | European         | heterozygous          | <i>LRRK2</i>  | p.R1441C  |                   |                          | NeuroChip, MLPA, WGS                 |
| 30        | sEOPD               | M   | Ashkenazi Jewish | homozygous            | <i>PNPLA6</i> | p.P1297S  | p.P1297S          |                          | NeuroChip, MLPA, NGS gene panel, WGS |
| 31        | feOPD               | M   | European         | compound heterozygous | <i>SPG7</i>   | p.N288*   | p.A510V           |                          | NeuroChip, MLPA, NGS gene panel, WGS |
| 32        | sEOPD               | F   | European         | compound heterozygous | <i>PLA2G6</i> | p.T319M   | p.L354P           |                          | NeuroChip, MLPA, NGS gene panel, WGS |
| 33        | feOPD               | M   | European         | compound heterozygous | <i>PRKN</i>   | p.C166Y   | Exon 1-3 deletion |                          | NeuroChip, MLPA, NGS gene panel      |
|           | feOPD               | M   | European         | compound heterozygous | <i>PRKN</i>   | p.C253Y   | Exon 3-4 deletion |                          | NeuroChip, MLPA, NGS gene panel      |
| 34        | feOPD               | M   | European         | -                     | -             | -         | -                 |                          | NeuroChip                            |
|           | feOPD               | M   | European         | -                     | -             | -         | -                 |                          | NeuroChip                            |
|           | Unaffected          | F   | European         | -                     | -             | -         | -                 |                          | NeuroChip                            |
|           | Unaffected          | M   | European         | -                     | -             | -         | -                 |                          | NeuroChip                            |

**Supplementary Table 1.** Demographic characteristics and mutation details of families carrying PD-causing pathogenic mutations

| Family ID | Diagnostic category | Sex | Ethnicity   | Zygoty                | Gene         | Variant 1         | Variant 2          | Additional risk variants | Investigations                       |
|-----------|---------------------|-----|-------------|-----------------------|--------------|-------------------|--------------------|--------------------------|--------------------------------------|
| 35        | fEOPD               | F   | European    | compound heterozygous | <i>PRKN</i>  | p.Q34Rfs*5        | Exon 2 deletion    |                          | NeuroChip, MLPA, WGS                 |
| 36        | sEOPD               | M   | European    | compound heterozygous | <i>PRKN</i>  | p.G284R           | p.C166Hfs*18       |                          | NeuroChip, WGS                       |
| 37        | sEOPD               | M   | European    | compound heterozygous | <i>PRKN</i>  | p.G430D           | p.P113fs           |                          | NeuroChip, MLPA, WGS                 |
| 38        | sEOPD               | F   | European    | compound heterozygous | <i>PRKN</i>  | p.N52Mfs*59       | p.W74Cfs*8         |                          | NeuroChip, MLPA, NGS gene panel      |
| 39*       | sEOPD               | M   | European    | compound heterozygous | <i>PRKN</i>  | p.P113fs          | Exons 2-3 deletion |                          | NeuroChip, MLPA, NGS gene panel      |
| 40        | sEOPD               | F   | European    | homozygous            | <i>PRKN</i>  | p.R275W           | p.R275W            |                          | NeuroChip, MLPA                      |
|           | Unaffected          | M   | European    | heterozygous          | <i>PRKN</i>  | p.R275W           | -                  |                          | NeuroChip                            |
| 41        | fEOPD               | F   | European    | compound heterozygous | <i>PRKN</i>  | p.G430D           | p.R275W            |                          | NeuroChip, MLPA                      |
|           | Unaffected          | F   | European    | heterozygous          | <i>PRKN</i>  | p.G430D           | -                  |                          | NeuroChip                            |
| 42        | sEOPD               | M   | European    | compound heterozygous | <i>PRKN</i>  | p.R275W           | Exon 3 deletion    |                          | NeuroChip, MLPA                      |
|           | Unaffected          | F   | European    | heterozygous          | <i>PRKN</i>  | p.R275W           | -                  |                          | NeuroChip                            |
| 43        | Unaffected          | F   | European    | -                     | -            | -                 | -                  |                          | NeuroChip                            |
|           | fEOPD               | M   | European    | compound heterozygous | <i>PRKN</i>  | p.R275W           | Exon 4 deletion    |                          | NeuroChip, MLPA, WGS                 |
| 44        | sEOPD               | M   | European    | compound heterozygous | <i>PRKN</i>  | p.R275W           | Exon 4 deletion    |                          | NeuroChip, MLPA, NGS gene panel      |
| 45        | fEOPD               | F   | European    | compound heterozygous | <i>PRKN</i>  | p.R275W           | Exon 5 deletion    |                          | NeuroChip, MLPA                      |
| 46        | fEOPD               | M   | European    | compound heterozygous | <i>PRKN</i>  | p.R275W           | Exon 8 deletion    |                          | NeuroChip, MLPA                      |
| 47        | sEOPD               | M   | European    | homozygous            | <i>PRKN</i>  | p.R275W           | p.R275W            |                          | NeuroChip, MLPA                      |
| 48        | fEOPD               | M   | European    | compound heterozygous | <i>PRKN</i>  | p.R42P            | Exon 3 duplication |                          | NeuroChip, MLPA                      |
| 49        | sEOPD               | M   | European    | compound heterozygous | <i>PRKN</i>  | p.T240M & p.P437L | Exon 2 deletion    |                          | NeuroChip, MLPA, NGS gene panel, WGS |
| 50        | sEOPD               | F   | South Asian | homozygous            | <i>PINK1</i> | p.Y258*           | p.Y258*            |                          | NeuroChip, MLPA                      |
| 51        | sEOPD               | F   | European    | heterozygous          | <i>SNCA</i>  | Duplication       |                    |                          | NeuroChip, MLPA                      |
| 52        | sEOPD               | M   | European    | heterozygous          | <i>SNCA</i>  | Duplication       |                    |                          | NeuroChip, MLPA                      |
| 53        | fLOPD               | M   | European    | heterozygous          | <i>VCP</i>   | p.R159C           |                    |                          | NeuroChip, MLPA, WGS                 |

NA = Not available, AAO = Age at onset, AAC = age at consent, WGS = whole-genome sequencing, NGS = next-generation sequencing.

\*Consanguineous family. ^Families found to be related by kinship analysis.



**Supplementary Table 2.** Demographic characteristics and mutation details of families carrying a single heterozygous mutation in recessive genes *PINK1* and *PRKN*

| Family ID | Diagnostic category | Sex | Ethnicity     | Gene         | Variant 1              | Variant 2   | Additional risk variants | Investigations                       |
|-----------|---------------------|-----|---------------|--------------|------------------------|-------------|--------------------------|--------------------------------------|
| 1*        | fEOPD               | F   | European      | <i>PINK1</i> | Exon 1 deletion        |             |                          | NeuroChip, MLPA                      |
|           | fEOPD               | M   | European      | <i>PINK1</i> | Exon 5 deletion        |             | <i>GBA</i> p.N409S       | NeuroChip, MLPA, NGS gene panel, WGS |
| 2         | Unaffected          | M   | European      | -            | -                      |             | <i>GBA</i> p.N409S       | NeuroChip                            |
|           | Unaffected          | F   | European      | -            | -                      |             | -                        | NeuroChip                            |
| 3         | fEOPD               | F   | European      | <i>PRKN</i>  | p.G430D                |             |                          | NeuroChip, MLPA                      |
|           | Unaffected          | F   | European      | <i>PRKN</i>  | p.G430D                |             |                          | NeuroChip                            |
| 4         | fLOPD               | F   | European      | <i>PRKN</i>  | p.K211N                |             |                          | NeuroChip, MLPA, WGS                 |
| 5         | fEOPD               | M   | South Asian   | <i>PRKN</i>  | p.Q34fs                |             |                          | NeuroChip, MLPA                      |
| 6         | fEOPD               | M   | European      | <i>PRKN</i>  | p.P437L                |             |                          | NeuroChip, MLPA, NGS gene panel      |
| 7         | fEOPD               | F   | European      | <i>PRKN</i>  | p.P437L                |             |                          | NeuroChip, MLPA                      |
|           | fLOPD               | F   | European      | <i>PRKN</i>  | p.P437L                | p.P132Tfs*9 |                          | NeuroChip, MPLA, NGS gene panel      |
| 8         | fEOPD               | M   | European      | <i>PRKN</i>  | p.P437L                |             |                          | NeuroChip, MLPA                      |
| 9         | fLOPD               | F   | European      | <i>PRKN</i>  | p.P437L                |             |                          | NeuroChip, MLPA                      |
| 10        | fLOPD               | M   | European      | <i>PRKN</i>  | p.P437L                |             |                          | NeuroChip, MLPA                      |
| 11        | fLOPD               | F   | European      | <i>PRKN</i>  | p.P437L                |             |                          | NeuroChip, MLPA                      |
| 12        | fLOPD               | F   | European      | <i>PRKN</i>  | p.P437L                |             |                          | NeuroChip, MLPA                      |
| 13        | fLOPD               | M   | European      | <i>PRKN</i>  | p.P437L                |             |                          | NeuroChip, WGS                       |
| 14        | sEOPD               | F   | European      | <i>PRKN</i>  | p.R275W                |             |                          | NeuroChip, MLPA                      |
| 15        | fLOPD               | M   | European      | <i>PRKN</i>  | p.R275W                |             |                          | NeuroChip, MLPA, WGS                 |
| 16        | sEOPD               | M   | European      | <i>PRKN</i>  | p.R275W                |             |                          | NeuroChip, MLPA                      |
|           | fEOPD               | M   | European      | <i>PRKN</i>  | p.R275W                |             |                          | NeuroChip, MLPA                      |
| 17        | fLOPD               | F   | European      | <i>PRKN</i>  | p.R275W                |             |                          | NeuroChip                            |
|           | fLOPD               | F   | European      | <i>PRKN</i>  | Exons 1-2 duplication  |             |                          | NeuroChip, MLPA                      |
| 19        | fLOPD               | M   | Central Asian | <i>PRKN</i>  | Exon 2 deletion        |             |                          | NeuroChip, MLPA                      |
| 20        | fLOPD               | F   | European      | <i>PRKN</i>  | Exon 2 duplication     |             |                          | NeuroChip, MLPA                      |
| 21        | fLOPD               | F   | European      | <i>PRKN</i>  | Exon 2 duplication     |             |                          | NeuroChip, MLPA                      |
| 22        | sEOPD               | F   | European      | <i>PRKN</i>  | Exons 2 & 4-7 deletion |             |                          | NeuroChip, MLPA                      |
| 23        | fEOPD               | F   | European      | <i>PRKN</i>  | Exons 3 & 5 deletion   |             |                          | NeuroChip, MLPA                      |
| 24        | fEOPD               | M   | European      | <i>PRKN</i>  | Exon 3 deletion        |             |                          | NeuroChip, MLPA                      |
| 25        | sEOPD               | M   | European      | <i>PRKN</i>  | Exons 3-4 & 8 deletion |             |                          | NeuroChip, MLPA, WGS                 |
| 26        | fLOPD               | F   | European      | <i>PRKN</i>  | Exons 3-6 duplication  |             |                          | NeuroChip, MLPA                      |
| 27        | fEOPD               | M   | European      | <i>PRKN</i>  | Exon 3-6 duplication   |             |                          | NeuroChip, MLPA                      |
| 28        | fEOPD               | F   | European      | <i>PRKN</i>  | Exons 3 & 5-7 deletion |             |                          | NeuroChip, MLPA                      |
| 29        | sEOPD               | M   | European      | <i>PRKN</i>  | Exon 8 deletion        |             |                          | NeuroChip, MLPA                      |

NA = Not available, AAO = Age at onset, AAC = age at consent, WGS = whole-genome sequencing, NGS = next-generation sequencing.

\* consanguineous family

**Supplementary Table 3.** Unique PD-associated mutations identified per gene

| GBA            | LRRK2    | PRKN                   | PINK1           | PNPLA6   | PLA2G6  | SPG7    | SNCA        | VCP     |
|----------------|----------|------------------------|-----------------|----------|---------|---------|-------------|---------|
| p.D448H        | p.G2019S | <b>p.C166Hfs*18</b>    | p.Y258*         | p.P1297S | p.T319M | p.N288* | Duplication | p.R159C |
| p.G152E        | p.R1441C | p.C166Y                | Exon 1 deletion |          | p.L354P | p.A510V |             |         |
| p.G416S        |          | p.C253Y                | Exon 5 deletion |          |         |         |             |         |
| p.L29Afs*18    |          | p.G284R                |                 |          |         |         |             |         |
| p.N409S        |          | p.G430D                |                 |          |         |         |             |         |
| p.P138Lfs*62   |          | p.K211N                |                 |          |         |         |             |         |
| <b>p.P430H</b> |          | p.N52Mfs*59            |                 |          |         |         |             |         |
| p.R159Q        |          | p.P113fs               |                 |          |         |         |             |         |
| p.R159W        |          | <b>p.P132Tfs*9</b>     |                 |          |         |         |             |         |
| p.R296Q        |          | p.P437L                |                 |          |         |         |             |         |
| p.R398*        |          | p.Q34Rfs*5             |                 |          |         |         |             |         |
| p.R502C        |          | p.R42P                 |                 |          |         |         |             |         |
| p.T362I        |          | p.R275W                |                 |          |         |         |             |         |
|                |          | p.T240M                |                 |          |         |         |             |         |
|                |          | p.W74Cfs*8             |                 |          |         |         |             |         |
|                |          | Exons 1-3 deletion     |                 |          |         |         |             |         |
|                |          | Exon 2 deletion        |                 |          |         |         |             |         |
|                |          | Exons 2-3 deletion     |                 |          |         |         |             |         |
|                |          | Exons 2 & 4-7 deletion |                 |          |         |         |             |         |
|                |          | Exon 3 deletion        |                 |          |         |         |             |         |
|                |          | Exons 3-4 deletion     |                 |          |         |         |             |         |
|                |          | Exons 3 & 5 deletion   |                 |          |         |         |             |         |
|                |          | Exons 3-4 & 8 deletion |                 |          |         |         |             |         |
|                |          | Exons 3, 5-7 deletion  |                 |          |         |         |             |         |
|                |          | Exon 4 deletion        |                 |          |         |         |             |         |
|                |          | Exon 5 deletion        |                 |          |         |         |             |         |
|                |          | Exon 8 deletion        |                 |          |         |         |             |         |
|                |          | Exons 1-2 duplication  |                 |          |         |         |             |         |
|                |          | Exon 2 duplication     |                 |          |         |         |             |         |
|                |          | Exon 3 duplication     |                 |          |         |         |             |         |
|                |          | Exons 3-6 duplication  |                 |          |         |         |             |         |

Novel variants are indicated in bold.

**Supplementary Table 4.** Demographic characteristics of index cases by gene

|                                                          | <i>SNCA</i>              | <i>VCP</i> | <i>LRRK2</i>             | <i>PNPLA6</i> | <i>PINK1</i> | <i>SPG7</i> | <i>PLA2G6</i> | <i>PRKN</i>              | <i>GBA</i> *             | Mutation-negative | P-value         |
|----------------------------------------------------------|--------------------------|------------|--------------------------|---------------|--------------|-------------|---------------|--------------------------|--------------------------|-------------------|-----------------|
| <b>Index cases (N)</b>                                   | 2                        | 1          | 29                       | 1             | 1            | 1           | 1             | 17                       | 18                       | 614               |                 |
| <b>Sex (N Female)</b>                                    | 1                        | 0          | 14                       | 0             | 1            | 0           | 1             | 5                        | 7                        | 259               | 0.793           |
| <b>Age at Diagnosis (mean ± sd) **</b>                   | 44.5 (0.71) <sup>d</sup> | 61-65      | 58.7 (13.3) <sup>d</sup> | 31-35         | 36-40        | 41-45       | 36-40         | 35.9 (8.70) <sup>c</sup> | 50.8 (10.2) <sup>d</sup> | 56.8 (13.6)       | <b>1.89E-07</b> |
| <b>Age at Assessment (mean ± sd) **</b>                  | 48.5 (0.71) <sup>d</sup> | 66-70      | 63.9 (11.3) <sup>d</sup> | 36-40         | 51-55        | 46-50       | 41-45         | 49.8 (13.6) <sup>a</sup> | 53.8 (10.4) <sup>a</sup> | 61.4 (12.8)       | <b>4.93E-04</b> |
| <b>Disease duration at assessment (Years, mean ± sd)</b> | 8.5 (4.95) <sup>d</sup>  | 8          | 6.86 (4.68)              | 8             | 26           | 20          | 5             | 22.6 (14.9) <sup>b</sup> | 7.33 (8.74) <sup>d</sup> | 8.3 (8.1)         | <b>4.27E-04</b> |
| <b>Genetically Determined Ancestry (%)</b>               |                          |            |                          |               |              |             |               |                          |                          |                   | 0.128           |
| African                                                  | 0                        | 0          | 0                        | 0             | 0            | 0           | 0             | 0                        | 0                        | 0.5               |                 |
| American                                                 | 0                        | 0          | 0                        | 0             | 0            | 0           | 0             | 0                        | 0                        | 0.5               |                 |
| Ashkenazi Jewish                                         | 0                        | 0          | 10.3                     | 100           | 0            | 0           | 0             | 0                        | 11.1                     | 0.6               |                 |
| Central Asian                                            | 0                        | 0          | 0                        | 0             | 0            | 0           | 0             | 0                        | 0                        | 0.3               |                 |
| East Asian                                               | 0                        | 0          | 0                        | 0             | 0            | 0           | 0             | 0                        | 0                        | 0.2               |                 |
| European                                                 | 100                      | 100        | 86.2                     | 0             | 0            | 100         | 100           | 100                      | 83.3                     | 93.6              |                 |
| Middle Eastern                                           | 0                        | 0          | 0                        | 0             | 0            | 0           | 0             | 0                        | 0                        | 0.3               |                 |
| South Asian                                              | 0                        | 0          | 0                        | 0             | 100          | 0           | 0             | 0                        | 0                        | 3.6               |                 |
| Unknown                                                  | 0                        | 0          | 3.5                      | 0             | 0            | 0           | 0             | 0                        | 5.6                      | 0.3               |                 |
| <b>Family history (%)</b>                                |                          |            |                          |               |              |             |               |                          |                          |                   | 0.025***        |
| No family history                                        | 100                      | 0          | 17.2                     | 100           | 100          | 0           | 100           | 52.9                     | 22.2                     | 27.4              |                 |
| One affected relative                                    | 0                        | 0          | 31                       | 0             | 0            | 100         | 0             | 35.3                     | 55.6                     | 48.0              |                 |
| Two affected relatives                                   | 0                        | 100        | 27.6                     | 0             | 0            | 0           | 0             | 11.8                     | 16.7                     | 17.3              |                 |
| Three or more affected relatives                         | 0                        | 0          | 24.1                     | 0             | 0            | 0           | 0             | 0                        | 5.6                      | 7.3               |                 |
| <b>Self-reported parental consanguinity (%)</b>          | 0                        | 0          | 3.8                      | 0             | NA           | 0           | 0             | 7.14                     | 0                        | 0.89              | 0.123           |

\*Excludes one case with concomitant *LRRK2* p.G2019S mutation and one case with concomitant *PINK1* heterozygous exon 5 deletion. \*\*When N = 1, Age at Diagnosis and Age at Assessment are presented as a 5-year age bracket. NA = not available. Continuous variables were compared with Kruskal-Wallis test with FDR-adjusted P-values for multiple comparisons. Significance levels show comparison with mutation-negative group only: a, P<0.05. b, P<0.001. c, P<0.0001. d, not significant. Categorical variables were compared with Fisher's exact test. Only genes with N≥2 were tested. \*\*\*No significant P-values after FDR-adjusted pairwise comparisons across genes.

**Supplementary Table 5.** Genetic testing methods by disease category of index case

| <b>N (%)</b>                          | <b>sEOPD<br/>n =196</b> | <b>fEOPD<br/>n = 112</b> | <b>fLOPD<br/>n =406</b> | <b>Total<br/>N = 714</b> |
|---------------------------------------|-------------------------|--------------------------|-------------------------|--------------------------|
| NeuroChip SNP array                   | 194 (99.0)              | 111 (99.1)               | 404 (99.5)              | 709 (99.3)               |
| MLPA assay                            | 178 (90.8)              | 107 (95.5)               | 255 (62.8)              | 540 (75.6)               |
| Gene panel or whole-genome sequencing | 43 (21.9)               | 31 (27.7)                | 62 (15.3)               | 136 (19.0)               |

**Supplementary Table 6.** Demographic characteristics and mutation details of families carrying a heterozygous mutation in *GBA*

| Family ID | Diagnosis  | Sex | Ethnicity        | Gene       | Variant      | Additional variants         | Investigations                       |
|-----------|------------|-----|------------------|------------|--------------|-----------------------------|--------------------------------------|
| 1         | fLOPD      | F   | European         | <i>GBA</i> | p.D448H      |                             | NeuroChip, MLPA                      |
| 2         | sEOPD      | M   | European         | <i>GBA</i> | p.G152E      |                             | NeuroChip, MLPA, WGS                 |
| 3         | fEOPD      | F   | European         | <i>GBA</i> | p.G416S      |                             | NeuroChip, MLPA, NGS gene panel, WGS |
| 4         | fLOPD      | F   | European         | <i>GBA</i> | p.N409S      |                             | NeuroChip                            |
| 5         | fEOPD      | M   | European         | <i>GBA</i> | p.N409S      | <i>PINK1</i> exon5 deletion | NeuroChip, MLPA, NGS gene panel, WGS |
|           | Unaffected | M   | European         | <i>GBA</i> | p.N409S      |                             | NeuroChip                            |
|           | Unaffected | F   | European         | -          | -            |                             | NeuroChip                            |
| 6         | fLOPD      | F   | European         | <i>GBA</i> | p.N409S      |                             | NeuroChip, MLPA                      |
| 7         | fEOPD      | M   | Ashkenazi Jewish | <i>GBA</i> | p.N409S      |                             | NeuroChip, MLPA                      |
|           | Unaffected | F   | European         | <i>GBA</i> | p.N409S      |                             | NeuroChip                            |
| 8         | sEOPD      | M   | Ashkenazi Jewish | <i>GBA</i> | p.N409S      |                             | NeuroChip, MLPA                      |
| 9         | sEOPD      | F   | NA               | <i>GBA</i> | p.P138Lfs*62 |                             | WGS                                  |
| 10        | fLOPD      | M   | European         | <i>GBA</i> | p.P430H      |                             | NeuroChip, WGS                       |
| 11        | fLOPD      | M   | European         | <i>GBA</i> | p.R159Q      |                             | NeuroChip, MLPA, WGS                 |
| 12        | fEOPD      | M   | European         | <i>GBA</i> | p.R159W      |                             | NeuroChip, MLPA, WGS                 |
|           | fEOPD      | M   | European         | <i>GBA</i> | p.R296Q      |                             | NeuroChip, MLPA                      |
| 13        | Unaffected | F   | European         | <i>GBA</i> | p.R296Q      |                             | NeuroChip                            |
|           | Unaffected | F   | European         | <i>GBA</i> | p.R296Q      |                             | NeuroChip                            |
| 14        | fLOPD      | F   | European         | <i>GBA</i> | p.R398*      |                             | NeuroChip                            |
| 15        | fLOPD      | F   | European         | <i>GBA</i> | p.R502C      |                             | NeuroChip                            |
| 16        | fLOPD      | M   | European         | <i>GBA</i> | p.R502C      |                             | NeuroChip, MLPA                      |
| 17        | fLOPD      | M   | European         | <i>GBA</i> | p.R502C      |                             | NeuroChip, MLPA                      |
| 18        | sEOPD      | M   | European         | <i>GBA</i> | p.R502C      |                             | NeuroChip                            |
| 19        | fEOPD      | M   | European         | <i>GBA</i> | p.T362I      |                             | NeuroChip                            |
| 20        | fLOPD      | F   | Ashkenazi Jewish | <i>GBA</i> | p.L29Afs*18  | <i>LRRK2</i> p.G2019S       | NeuroChip, NGS gene panel, WGS       |

NA = Not available, AAO = Age at onset, AAC = age at consent, WGS = whole-genome sequencing, NGS = next-generation sequencing.

**Supplementary Table 7. PD-associated SNPs with probes in NeuroChip**

| Gene           | Chr | c.DNA        | Protein change | Clinvar classification       | MDSGene classification |
|----------------|-----|--------------|----------------|------------------------------|------------------------|
| <i>PRKN</i>    | 6   | c.1359G>A    | p.Trp453*      | Likely pathogenic            | Definitely pathogenic  |
| <i>PRKN</i>    | 6   | c.1292G>T    | p.Cys431Phe    | Pathogenic                   |                        |
| <i>PRKN</i>    | 6   | c.1289G>A    | p.Gly430Asp    | Pathogenic                   |                        |
| <i>PRKN</i>    | 6   | c.931C>T     | p.Gln311*      | Pathogenic                   | Definitely pathogenic  |
| <i>PRKN</i>    | 6   | c.850G>C     | p.Gly284Arg    | Pathogenic                   |                        |
| <i>PRKN</i>    | 6   | c.823C>T     | p.Arg275Trp    | Pathogenic                   | Definitely pathogenic  |
| <i>PRKN</i>    | 6   | c.635G>A     | p.Cys212Tyr    | Pathogenic                   | Definitely pathogenic  |
| <i>PRKN</i>    | 6   | c.633A>T     | p.Lys211Asn    | Pathogenic                   | Definitely pathogenic  |
| <i>PRKN</i>    | 6   | c.483A>T     | p.Lys161Asn    | Pathogenic                   |                        |
| <i>PRKN</i>    | 6   | c.98G>A      | p.Arg33Gln     | Pathogenic                   |                        |
| <i>PRKN</i>    | 6   | c.1334G>A    | p.Trp445*      | Pathogenic                   |                        |
| <i>PRKN</i>    | 6   | c.1321T>C    | p.Cys441Arg    | Pathogenic                   |                        |
| <i>PRKN</i>    | 6   | c.1252T>C    | p.Cys418Arg    | Likely pathogenic            |                        |
| <i>PRKN</i>    | 6   | c.1244C>A    | p.Thr415Asn    | Likely pathogenic            |                        |
| <i>PRKN</i>    | 6   | c.125G>C     | p.Arg42Pro     | Pathogenic                   | Definitely pathogenic  |
| <i>PRKN</i>    | 6   | c.865T>G     | p.Cys289Gly    |                              | Definitely pathogenic  |
| <i>PRKN</i>    | 6   | c.1310C>T    | p.Pro437Leu    | Conflicting interpretations  | Definitely pathogenic  |
| <i>PRKN</i>    | 6   | c.101_102del | p.Gln34fs      | Pathogenic                   |                        |
| <i>PRKN</i>    | 6   | c.220_221dup | p.Trp74fs      | Pathogenic/Likely pathogenic |                        |
| <i>PINK1</i>   | 1   | c.502G>C     | p.Ala168Pro    | Pathogenic                   | Definitely pathogenic  |
| <i>PINK1</i>   | 1   | c.650C>A     | p.Ala217Asp    | Pathogenic                   |                        |
| <i>PINK1</i>   | 1   | c.736C>T     | p.Arg246*      | Pathogenic                   |                        |
| <i>PINK1</i>   | 1   | c.774C>A     | p.Tyr258*      | Pathogenic                   |                        |
| <i>PINK1</i>   | 1   | c.813C>A     | p.His271Gln    | Pathogenic                   | Definitely pathogenic  |
| <i>PINK1</i>   | 1   | c.926G>A     | p.Gly309Asp    | Pathogenic                   | Definitely pathogenic  |
| <i>PINK1</i>   | 1   | c.938C>T     | p.Thr313Met    | Pathogenic                   |                        |
| <i>PINK1</i>   | 1   | c.1040T>C    | p.Leu347Pro    | Pathogenic                   | Definitely pathogenic  |
| <i>PINK1</i>   | 1   | c.1311G>A    | p.Trp437*      | Pathogenic                   | Definitely pathogenic  |
| <i>PINK1</i>   | 1   | c.1366C>T    | p.Gln456*      | Pathogenic                   | Definitely pathogenic  |
| <i>PINK1</i>   | 1   | c.1474C>T    | p.Arg492*      | Pathogenic                   |                        |
| <i>PINK1</i>   | 1   | c.1162T>C    | p.Cys388Arg    | Likely pathogenic            | Definitely pathogenic  |
| <i>PINK1</i>   | 1   | c.377A>C     | p.Gln126Pro    | Likely pathogenic            |                        |
| <i>PINK1</i>   | 1   | c.509T>G     | p.Val170Gly    |                              | Definitely pathogenic  |
| <i>PINK1</i>   | 1   | c.718G>A     | p.Glu240Lys    |                              | Definitely pathogenic  |
| <i>PINK1</i>   | 1   | c.1226G>T    | p.Gly409Val    |                              | Definitely pathogenic  |
| <i>PINK1</i>   | 1   | c.1250A>G    | p.Glu417Gly    |                              | Definitely pathogenic  |
| <i>PARK7</i>   | 1   | c.29T>C      | p.Leu10Pro     |                              | Definitely pathogenic  |
| <i>PARK7</i>   | 1   | c.78G>A      | p.Met26Ile     | Pathogenic                   | Definitely pathogenic  |
| <i>PARK7</i>   | 1   | c.115G>T     | p.Ala39Ser     | Pathogenic                   |                        |
| <i>PARK7</i>   | 1   | c.192G>C     | p.Glu64Asp     | Pathogenic                   | Definitely pathogenic  |
| <i>PARK7</i>   | 1   | c.497T>C     | p.Leu166Pro    | Pathogenic                   | Definitely pathogenic  |
| <i>PARK7</i>   | 1   | c.133C>T     | p.Gln45*       | Pathogenic                   |                        |
| <i>ATP13A2</i> | 1   | c.2629G>A    | p.Gly877Arg    | Pathogenic                   |                        |
| <i>ATP13A2</i> | 1   | c.2561T>G    | p.Met854Arg    | Pathogenic                   |                        |
| <i>ATP13A2</i> | 1   | c.1903C>T    | p.Gln635*      | Pathogenic                   |                        |
| <i>ATP13A2</i> | 1   | c.3176T>G    | p.Leu1059Arg   | Likely pathogenic            | Definitely pathogenic  |
| <i>ATP13A2</i> | 1   | c.2529+1G>A  | NA             | Likely pathogenic            |                        |
| <i>ATP13A2</i> | 1   | c.477+2T>G   | NA             | Pathogenic/Likely pathogenic |                        |
| <i>ATP13A2</i> | 1   | c.2113C>T    | p.Gln705Ter    | Pathogenic                   |                        |
| <i>FBXO7</i>   | 22  | c.65C>T      | p.Thr22Met     | Pathogenic                   | Definitely pathogenic  |
| <i>FBXO7</i>   | 22  | c.1492C>T    | p.Arg498*      | Pathogenic                   | Definitely pathogenic  |
| <i>FBXO7</i>   | 22  | c.961C>T     | p.Arg321*      | Likely pathogenic            |                        |
| <i>FBXO7</i>   | 22  | c.1033C>T    | p.Arg345*      | Likely pathogenic            |                        |
| <i>SNCA</i>    | 4   | c.157G>A     | p.Ala53Thr     | Pathogenic                   | Definitely pathogenic  |
| <i>SNCA</i>    | 4   | c.152G>A     | p.Gly51Asp     | Pathogenic                   | Definitely pathogenic  |
| <i>SNCA</i>    | 4   | c.136G>A     | p.Glu46Lys     | Pathogenic                   |                        |
| <i>SNCA</i>    | 4   | c.88G>C      | p.Ala30Pro     | Pathogenic                   |                        |
| <i>LRRK2</i>   | 12  | c.3364A>G    | p.Ile1122Val   | Pathogenic                   |                        |
| <i>LRRK2</i>   | 12  | c.4321C>T    | p.Arg1441Cys   | Pathogenic                   | Definitely pathogenic  |
| <i>LRRK2</i>   | 12  | c.5096A>G    | p.Tyr1699Cys   | Pathogenic                   | Definitely pathogenic  |
| <i>LRRK2</i>   | 12  | c.6055G>A    | p.Gly2019Ser   | Pathogenic                   | Definitely pathogenic  |
| <i>LRRK2</i>   | 12  | c.6059T>C    | p.Ile2020Thr   | Pathogenic                   | Definitely pathogenic  |
| <i>VPS35</i>   | 16  | c.1858G>A    | p.Asp620Asn    | Pathogenic                   | Definitely pathogenic  |
| <i>DCTN1</i>   | 2   | c.221A>C     | p.Gln74Pro     | Pathogenic                   |                        |
| <i>DCTN1</i>   | 2   | c.212G>A     | p.Gly71Glu     | Pathogenic                   |                        |
| <i>DCTN1</i>   | 2   | c.211G>A     | p.Gly71Arg     | Pathogenic                   | Definitely pathogenic  |
| <i>DCTN1</i>   | 2   | c.200G>A     | p.Gly67Asp     | Pathogenic                   |                        |
| <i>DCTN1</i>   | 2   | c.175G>A     | p.Gly59Ser     | Pathogenic                   |                        |
| <i>DCTN1</i>   | 2   | c.156T>G     | p.Phe52Leu     | Pathogenic                   |                        |

**Supplementary Table 7. PD-associated SNPs with probes in NeuroChip**

| Gene         | Chr | c.DNA     | Protein change | Clinvar classification       | MDSGene classification |
|--------------|-----|-----------|----------------|------------------------------|------------------------|
| <i>DCTN1</i> | 2   | c.3823C>T | p.Arg1275Cys   | Likely pathogenic            |                        |
| <i>DCTN1</i> | 2   | c.175G>C  | p.Gly59Arg     | Pathogenic                   |                        |
| <i>VCP</i>   | 9   | c.695C>A  | p.Ala232Glu    | Pathogenic                   |                        |
| <i>VCP</i>   | 9   | c.572G>A  | p.Arg191Gln    | Pathogenic/Likely pathogenic |                        |
| <i>VCP</i>   | 9   | c.476G>A  | p.Arg159His    | Pathogenic                   |                        |
| <i>VCP</i>   | 9   | c.475C>T  | p.Arg159Cys    | Pathogenic                   |                        |
| <i>VCP</i>   | 9   | c.463C>T  | p.Arg155Cys    | Pathogenic                   |                        |
| <i>VCP</i>   | 9   | c.283C>G  | p.Arg95Gly     | Pathogenic                   |                        |
| <i>VCP</i>   | 9   | c.277C>T  | p.Arg93Cys     | Pathogenic                   |                        |
| <i>VCP</i>   | 9   | c.472A>G  | p.Met158Val    | Pathogenic                   |                        |
| <i>VCP</i>   | 9   | c.469G>C  | p.Gly157Arg    | Pathogenic                   |                        |
| <i>VCP</i>   | 9   | c.284G>A  | p.Arg95His     | Likely pathogenic            |                        |
| <i>VCP</i>   | 9   | c.278G>A  | p.Arg93His     | Likely pathogenic            |                        |
| <i>VCP</i>   | 9   | c.553G>A  | p.Glu185Lys    | Likely pathogenic            |                        |
| <i>VCP</i>   | 9   | c.466G>A  | p.Gly156Ser    | Pathogenic                   |                        |
| <i>GBA</i>   | 1   | c.1549G>A | p.Gly517Ser    | Pathogenic                   |                        |
| <i>GBA</i>   | 1   | c.1505G>A | p.Arg502His    | Pathogenic/Likely pathogenic |                        |
| <i>GBA</i>   | 1   | c.1504C>T | p.Arg502Cys    | Pathogenic                   |                        |
| <i>GBA</i>   | 1   | c.1503C>G | p.Asn501Lys    | Likely pathogenic            |                        |
| <i>GBA</i>   | 1   | c.1448T>G | p.Leu483Arg    | Pathogenic/Likely pathogenic |                        |
| <i>GBA</i>   | 1   | c.1342G>C | p.Asp448His    | Pathogenic/Likely pathogenic |                        |
| <i>GBA</i>   | 1   | c.1297G>T | p.Val433Leu    | Pathogenic/Likely pathogenic |                        |
| <i>GBA</i>   | 1   | c.1271T>C | p.Leu424Pro    | Likely pathogenic            |                        |
| <i>GBA</i>   | 1   | c.1246G>A | p.Gly416Ser    | Pathogenic                   |                        |
| <i>GBA</i>   | 1   | c.1228C>G | p.Leu410Val    | Pathogenic                   |                        |
| <i>GBA</i>   | 1   | c.1226A>G | p.Asn409Ser    | Pathogenic/Likely pathogenic |                        |
| <i>GBA</i>   | 1   | c.1208G>C | p.Ser403Thr    | Likely pathogenic            |                        |
| <i>GBA</i>   | 1   | c.1192C>T | p.Arg398*      | Pathogenic                   |                        |
| <i>GBA</i>   | 1   | c.1174C>T | p.Arg392Trp    | Pathogenic                   |                        |
| <i>GBA</i>   | 1   | c.1174C>G | p.Arg392Gly    | Pathogenic                   |                        |
| <i>GBA</i>   | 1   | c.1171G>C | p.Val391Leu    | Pathogenic/Likely pathogenic |                        |
| <i>GBA</i>   | 1   | c.1090G>A | p.Gly364Arg    | Likely pathogenic            |                        |
| <i>GBA</i>   | 1   | c.1085C>T | p.Thr362Ile    | Pathogenic                   |                        |
| <i>GBA</i>   | 1   | c.983C>T  | p.Pro328Leu    | Pathogenic                   |                        |
| <i>GBA</i>   | 1   | c.928A>G  | p.Ser310Gly    | Likely pathogenic            |                        |
| <i>GBA</i>   | 1   | c.896T>C  | p.Ile299Thr    | Likely pathogenic            |                        |
| <i>GBA</i>   | 1   | c.887G>A  | p.Arg296Gln    | Pathogenic                   |                        |
| <i>GBA</i>   | 1   | c.870C>A  | p.Phe290Leu    | Pathogenic                   |                        |
| <i>GBA</i>   | 1   | c.764T>A  | p.Phe255Tyr    | Pathogenic/Likely pathogenic |                        |
| <i>GBA</i>   | 1   | c.709A>G  | p.Lys237Glu    | Pathogenic                   |                        |
| <i>GBA</i>   | 1   | c.703T>C  | p.Ser235Pro    | Pathogenic                   |                        |
| <i>GBA</i>   | 1   | c.701G>A  | p.Gly234Glu    | Likely pathogenic            |                        |
| <i>GBA</i>   | 1   | c.681T>G  | p.Asn227Lys    | Pathogenic                   |                        |
| <i>GBA</i>   | 1   | c.680A>G  | p.Asn227Ser    | Pathogenic/Likely pathogenic |                        |
| <i>GBA</i>   | 1   | c.625C>T  | p.Arg209Cys    | Pathogenic                   |                        |
| <i>GBA</i>   | 1   | c.509G>T  | p.Arg170Leu    | Likely pathogenic            |                        |
| <i>GBA</i>   | 1   | c.497A>T  | p.Asp166Val    | Likely pathogenic            |                        |
| <i>GBA</i>   | 1   | c.475C>T  | p.Arg159Trp    | Pathogenic                   |                        |
| <i>GBA</i>   | 1   | c.415G>C  | p.Ala139Pro    | Likely pathogenic            |                        |
| <i>GBA</i>   | 1   | c.254G>A  | p.Gly85Glu     | Pathogenic                   |                        |
| <i>GBA</i>   | 1   | c.160G>T  | p.Val54Leu     | Pathogenic                   |                        |
| <i>GBA</i>   | 1   | c.914C>T  | p.Pro305Leu    | Likely pathogenic            |                        |
| <i>GBA</i>   | 1   | c.894C>A  | p.Phe298Leu    | Likely pathogenic            |                        |
| <i>GBA</i>   | 1   | c.1342G>C | p.Asp448His    | Pathogenic/Likely pathogenic |                        |
| <i>GBA</i>   | 1   | c.1249T>G | p.Trp417Gly    | Pathogenic/Likely pathogenic |                        |
| <i>GBA</i>   | 1   | c.661C>A  | p.Pro221Thr    | Pathogenic/Likely pathogenic |                        |
| <i>GBA</i>   | 1   | c.314T>C  | p.Leu105Pro    | Likely pathogenic            |                        |
| <i>GBA</i>   | 1   | c.1300C>T | p.Arg434Cys    | Likely pathogenic            |                        |
| <i>GBA</i>   | 1   | c.1162G>A | p.Glu388Lys    | Likely pathogenic            |                        |
| <i>GBA</i>   | 1   | c.721G>A  | p.Gly241Arg    | Pathogenic/Likely pathogenic |                        |
| <i>GBA</i>   | 1   | c.721G>A  | p.Gly241Arg    | Pathogenic/Likely pathogenic |                        |
| <i>GBA</i>   | 1   | c.84dup   | p.Leu29fs      | Pathogenic                   |                        |

NA=not applicable. Pathogenic SNPs in genes associated with monogenic PD, classified by ClinVar as pathogenic/likely pathogenic and/or MDSGene as definitively pathogenic. GBA variants classified by ClinVar as pathogenic for Gaucher's disease or risk factors for PD.
